# Fgf10-Sox9 are essential for establishment of distal progenitor cells during salivary gland development

Lemonia Chatzeli<sup>1</sup>, Marcia Gaete<sup>1,2</sup>, Abigail S. Tucker<sup>1\*</sup>

<sup>1</sup>*Centre for Craniofacial and Regenerative Biology, King's College London, London, United Kingdom.*

<sup>2</sup>*Department of Anatomy, Faculty of Medicine, Pontificia Universidad Católica de Chile, Santiago, Chile.*

\*Correspondence to: [abigail.tucker@kcl.ac.uk](mailto:abigail.tucker@kcl.ac.uk)

**Key words:** Branching morphogenesis, epithelial progenitors, Sox9, Fgf signalling, salivary glands

**Summary statement:**

Glandular structures start development as a bud that undergoes proliferation and differentiation to create a branching structure with the distal progenitors controlled by *Sox9* expression induced by *Fgf10*.

**Abstract**

Salivary glands are formed by branching morphogenesis with epithelial progenitors forming a network of ducts and acini (secretory cells). During this process, epithelial progenitors specialise into distal (tips of the gland) and proximal (the stalk region) identities that produce the acini and higher order ducts respectively. Little is known about the factors that regulate progenitor expansion and specialisation in the different parts of the gland. Here we show that *Sox9* is involved in establishing the identity of the distal compartment before the initiation of branching morphogenesis. *Sox9* is expressed throughout the gland at the initiation stage before becoming restricted to the distal epithelium from the bud stage and throughout branching morphogenesis. Deletion of *Sox9* in the epithelium results in loss of the distal epithelial progenitors, a reduction in proliferation and a subsequent failure in branching. We demonstrate that *Sox9* is positively regulated by mesenchymal *Fgf10*, a process that requires active Erk signalling. These results provide new insights into the factors required for the expansion of salivary gland epithelial progenitors, which can be useful for organ regeneration therapy.

## Introduction

To develop therapeutic strategies for organ regeneration we first need to understand how progenitor cells contribute to organ formation. During development, organs such as lungs, lacrimal glands, pancreas and salivary glands undergo branching morphogenesis, a process that efficiently increases the surface area with a minimum increase of volume. Common to all branching epithelium, the embryonic salivary gland epithelium starts as a placode (also known as the prebud) which then elongates leading to the formation of a stalk attached to the bud (also known as the initial bud). The epithelium then undergoes sequential rounds of epithelial budding, clefting and epithelial outgrowth creating a highly branched network divided into ducts and endbuds (Affolter et al., 2003), these endbuds forming the secretory acini of the adult gland. Branching morphogenesis in many organs has been shown to require constant interactions between the epithelium, mesenchyme, blood vessels and nerves (Knosp et al., 2012). Salivary glands have long been used as a model to study branching morphogenesis because of their ease of *ex vivo* manipulation (Tucker, 2007). Among the three major types (submandibular (SMG) secreting seromucous, sublingual (SL) secreting mucous and parotid (PG) secreting serous saliva) the SMG is the most commonly studied.

As the epithelium initiates and undergoes branching it becomes specialised into distinct epithelial compartments. In salivary glands the earliest stage reported for this specialisation is after the initiation of branching at the pseudoglandular stage (E13.5) (Lombaert et al., 2011; Knox et al., 2010; Arnold et al., 2011; Lombaert et al., 2013). Based on the position of the cell within the developing gland and the expression of progenitor markers, the epithelium is divided into proximal and distal progenitors. In salivary glands the proximal progenitors, the cells located closer to the oral epithelium at the stalk region, express markers such as *cytokeratin 5* (K5) and *Sox2* [Sex-determining Region Y (SRY) box 2] (Lombaert et al., 2011; Knox et al., 2010; Arnold et al., 2011). The distal progenitors, located at the end of the gland, express *cytokeratin 14* (K14), *cKit* and *Sox10* (Sex-determining Region Y (SRY) box 10) (Lombaert et al., 2013). *cMyb* is also expressed at the distal epithelial progenitors as shown at E17.5 when terminal differentiation starts to occur (Matsumoto et al., 2016). The location of epithelial progenitors at specific time points during development has been suggested to determine their progeny. When epithelial rudiments of E13.5 SMGs were cultured *ex vivo* with Fgf7 and Fgf1, the distal epithelial progenitors labelled after a day in culture contributed to the formation of acini (secretory cells producing saliva) and secondary-and tertiary-branched ducts. However, when labelled after three days in culture at a stage where pro-acinar differentiation had already initiated, their lineage was restricted to the acinar compartments. The more proximal progenitors on the other hand could only contribute to the formation of higher order branched ducts (Matsumoto et al., 2016). Lumen formation in the ducts is marked by F-actin deposition while acinar differentiation is marked by the expression of *Mist1* (Walker et al., 2008; Aure et al., 2015). Interestingly, distal epithelial progenitors have been shown to be more proliferative than proximal (Steinberg et al., 2004; Matsumoto et al., 2016).

Although there is increasing information on the factors that regulate salivary gland branching morphogenesis, little is known about the signals that control the expansion of the different epithelial progenitors, or whether the distal epithelial progenitors alone are required for branching morphogenesis. Acetylcholine signalling through the parasympathetic ganglion was shown to promote the expansion of K5-positive cells and their differentiation to the ductal K19<sup>+</sup> lineage by a process which required Epidermal growth factor receptor (EGFR) signalling (Knox et al., 2010). On the other hand, epithelial Wnt and FgfR in combination with *cKit* signalling were shown to promote the expansion of the distal *Sox10*<sup>+</sup>*K14*<sup>+</sup> population (Lombaert et al., 2013; Matsumoto et al., 2016). Key pathway components for FgfR signalling in developing salivary glands are *Fgf10* and its receptor *Fgfr2* since mutations in either of the two genes lead to an arrest of salivary gland development at the placode stage (Jaskoll et al., 2005). *Fgf10* is expressed in the neural crest derived mesenchyme that surrounds the gland, with conditional knockout of *Fgf10* in the neural crest mimicking the null phenotype (Teshima et al., 2016), while *Fgfr2* is expressed in the gland epithelium (Jaskoll et al.,

2002). Similar to salivary glands, other branching organs were also arrested after knockout of *Fgf10* including the lung and lacrimal glands, while the pancreas was hypoplastic (Ohuchi et al., 2000).

In the lungs, lacrimal glands and pancreas FgfR2 signalling has been shown to regulate the expression of *Sox9*, which appears to act as a distal epithelial marker (Abler et al., 2009; Chang et al., 2013; Chen et al., 2014; Seymour et al., 2012). *Sox9* is a transcription factor that belongs to the highly conserved SOX family (subgroup E) characterised by the presence of the high mobility group DNA-binding domain of SRY (Pritchett et al., 2011). Initially *Sox9* was identified as a gene linked to campomelic dysplasia, a syndrome that causes male to female sex reversal and skeletal defects (Wagner et al., 1994). Apart from its importance in gonadal formation and chondrogenesis, *Sox9* is expressed in the epithelium of many developing branching organs including lacrimal glands, lungs, pancreas and kidneys. Its requirement for their development varies since conditional *Sox9* inactivation results either in complete agenesis, as in the case of the lacrimal glands (Chen et al., 2014) or in hypoplasticity, as in the case of the lungs and pancreas (Chang et al., 2013; Rockich et al., 2013; Seymour et al., 2007). Kidneys also rely on *Sox9* expression for their development, however, the severity of the phenotype is variable and ranges from agenesis to hypoplasia (Reginensi et al., 2011). Despite these variabilities, in general epithelial *Sox9* expression has been shown to promote progenitor cell expansion and extracellular matrix (ECM) deposition (Chang et al., 2013; Rockich et al., 2013; Chen et al., 2014). qPCR has shown that *Sox9* is expressed in developing salivary glands, with a peak of expression at E15.5 (Lombaert and Hoffman, 2010). The role of *Sox9* in salivary glands, however, has not been assessed.

Here we investigated the importance of *Sox9* in salivary gland development using the *Sox9<sup>flox/flox</sup>, K14-Cre<sup>+</sup> (Sox9<sup>CKO</sup>)* mouse line that induces *Sox9* epithelial ablation from the initiation stage of salivary gland development. We find that *Sox9* is highly expressed in the distal epithelial progenitors where it is required for their specification as a distal epithelial population and for subsequent branching morphogenesis. *Sox9* expression is maintained by *Fgf10* signalling by a process that requires active Erk signalling.

## Results

### ***Sox9* is restricted to the distal epithelial compartment from the bud stage of development and is maintained in this region throughout development**

As a first approach to understand the function of *Sox9* we traced its protein distribution during submandibular gland (SMG) development. During all stages, *Sox9*, as expected for a transcription factor was detected in the nucleus and was absent from the epithelium of *Sox9<sup>CKO</sup>* glands, indicating the high specificity of this antibody for *Sox9* (Fig. 1; Fig. S1B). At gland initiation (E11.0-11.5) all the epithelial cells of the placode and the early invaginating bud were *Sox9* positive (Fig. 1A, B). However, at the bud stage (E12.5), high levels of *Sox9* expression were only observed distally at the tip of the buds, with much lower expression proximally next to the oral surface (Fig. 1C). This pattern of epithelial *Sox9* expression, with higher levels at the distal tips, was maintained throughout branching morphogenesis at E13.5 and E15.5 (Fig. 1D, E). As lumens started to form in the more distal ducts (as indicated by F-actin) *Sox9* expression turned off (Fig. 1E). Interestingly, in the adult when differentiation had fully occurred, *Sox9* positive cells were still predominantly located in more distal structures, with large numbers of positive acinar cells, as shown by co-expression of *Sox9* and *Mist1* (Fig. 1F box). All *Mist1* positive cells were also *Sox9* positive indicating an important link between these two transcription factors in adult glands. Expression of *Sox9* was also observed in the small distally located intercalated ducts (Fig. 1F yellow outline), while fewer cells that stained less intensely were found in the bigger more proximal ducts (Fig. 1F arrowheads). Interestingly, the

intensity of Sox9 appeared to be lower in the acinar compartments than in the intercalated ducts in the adult (Fig. 1F), suggesting a change in role in fully differentiated glands. The parotid (PG) (Fig. 2A-C) and sublingual (SL) glands (Fig. 2D-F) displayed a similar pattern of Sox9 expression when compared to the SMG, suggesting that Sox9 plays a similar developmental role in all of the three major salivary glands (Fig. 2).

### Sox9-positive epithelial cells are progenitors of the entire salivary gland epithelium

Our protein localisation analysis revealed early Sox9 expression in the placode epithelium. To investigate whether these early Sox9-positive epithelial cells act as progenitors, we traced their progeny using *Sox9-creERT2* mice crossed with *Rosa-tdTomato* mice. After tamoxifen administration at E10.5, the entire epithelium of the E14.5 submandibular gland was labelled in red including all the ductal and acinar structures (Fig. 3). In agreement with the early Sox9 expression in the ganglia (Fig. 1C), label was also detected in the ganglia cells found in close association with the submandibular gland epithelium (Fig. 3C). Earlier tamoxifen administration labelled the mesenchyme (date not shown) in agreement with Sox9 expression in the neural crest, which form the salivary gland mesenchyme (Zhao et al., 1997).

### Sox9 is required for the formation of distal epithelial progenitors and for branching morphogenesis

To assess the role of *Sox9* during salivary gland development we deleted *Sox9* flox alleles in the oral epithelium using *K14-Cre*. The *K14* promoter induces Cre recombination in almost all epithelial cells of the salivary gland from the initiation stage (Fig. S1A, B). Immunofluorescence for Sox9 confirmed almost complete loss of Sox9 in the salivary gland epithelium, although a very small number of cells remained positive for Sox9, both at the placode (Fig. S1A, B) and later at the bud stage (Fig. S1C, D). As expected, Sox9 was still expressed in the surrounding mesenchyme, including Meckel's cartilage and the ganglia (Fig. S1B, D).

Although the initial thickening was normal, the bud was smaller at E12.5 (Fig. S1B, D). This defect was more marked as the gland continued to develop with *Sox9<sup>CKO</sup>* SMGs failing to branch (Fig. 4A-C). Development of the submandibular and sublingual glands arrested at the bud stage at timepoints when control glands had undergone extensive branching (Fig. 4D, E). A delay in branching was also evident in the heterozygous *Sox9<sup>CHET</sup>* mice (Fig. 4B). The mesenchymal capsule that develops around the epithelial tissue still formed in the *Sox9<sup>CKO</sup>* mutants, however, (Fig. 4D, E), as has been observed in *Fgf10* mutant mice (Wells et al., 2013). Similar to the SMGs and SL, the PG was undetectable by E15.5 (Fig. 5) suggesting that Sox9 is required for the formation of all three major salivary glands.

Since branching morphogenesis is a process that involves cleft formation and epithelial bud outgrowth through proliferation (Harunaga et al., 2011), we assessed cleft formation by morphological observation and laminin deposition (Fig. 4F; Fig. S2) and at proliferation by detecting BrdU incorporation (Fig. 4G-I). Although some degree of variability was observed, approximately 2/3 of the *Sox9<sup>CKO</sup>* SMGs displayed no signs of cleft formation, i.e. no ingression of laminin into the bud ( $P < 0.0001$ ) (Fig. 4F; Fig. S2C) in contrast to controls, where clefts were observed in every case (Fig. 4F; Fig. S2A). In the *Sox9<sup>CKO</sup>* SMGs where a cleft formed, a single cleft only was observed, while in the wildtype two or more clefts were evident (Fig S2). In the lung, *Sox9* ablation has been reported as causing aberrant laminin deposition on the basal surface of the epithelium. However, in our mutant salivary glands close examination of laminin in epithelial cells revealed no obvious deposition on the basal surface when compared to controls (Fig. S2A'-C'), suggesting key differences between the lung and salivary glands.

When proliferation was assessed, the ratio of cells that incorporated BrdU as a proportion of the total number of cells in the epithelium was reduced by approximately 1.5 fold in the *Sox9<sup>CKO</sup>* SMGs compared with the control glands at the bud stage ( $P < 0.05$ ) (Fig. 4G-I). The total number of epithelial cells was also reduced, approximately by 50%, in the *Sox9<sup>CKO</sup>* SMGs compared to that of controls at this stage ( $P < 0.05$ ) (Fig. 4L).

Having established that proliferation levels were significantly reduced in the mutant we then investigated cell death in the glands. Apart from a few activated caspase 3 positive cells at the site of ductal formation in both control and mutant glands (arrows in Fig. 4J, K) (Teshima et al., 2016), no aberrant activation was detected in the distal compartment suggesting that loss of *Sox9* does not lead to death of the epithelial cells of the gland.

During branching morphogenesis (E13.5) epithelia progenitors express different markers depending on their location along the distal-proximal axis of the developing salivary gland. These distinct populations contribute to the formation of different epithelial structures (Matsumoto et al., 2016). Given that *Sox9* is differentially expressed from E12.5, we assessed the expression of proximal (K5) and distal markers (*Sox10*, *cMyb*) before the initiation of branching morphogenesis, and found that the epithelial cells could also be divided into two different populations at the bud stage, with proximal cells located at the stalk expressing K5 (Fig. 6A) and distal cells located at the tip of the endbud expressing *Sox10* and *cMyb* (Fig. 6D, F). The early specification of the initial bud into distinct identities can be highlighted by dissecting the gland into distal and proximal compartments. The distal endbud goes on to branch in isolation, while the proximal stalk region fails to branch and has more limited growth (Fig. S3A-E). This data suggests that branching can initiate and progress independently of the proximal epithelium.

To understand the role of *Sox9* in distal cell fate, we investigated the expression of *Sox10* and *cMyb* in *Sox9<sup>CKO</sup>* SMGs. *Sox10* has been shown to be positively regulated by *Sox9* in the lacrimal glands (Chen et al., 2014), while *cMyb*, has been shown to inhibit acinar differentiation in SMGs (Matsumoto et al., 2016). Both were at low or undetectable levels in the *Sox9<sup>CKO</sup>* SMGs (Fig. 6D-G) indicating loss of this progenitor population in the absence of *Sox9*. To examine the identity of the epithelial progenitors in the *Sox9<sup>CKO</sup>* SMGs we investigated the expression of the proximal marker K5 (Fig. 6A, B). When the total number of cells was compared, the number of cells with a proximal identity remained the same, while only the number of K5-negative cells dramatically dropped (Fig. 6C). This suggests that contrary to the distal progenitors, the proximal do not require *Sox9* expression for their formation. To follow the proximal precursors at a later stage we then investigated the expression of another proximal marker, *Sox2*, at E13.5. *Sox2* is normally expressed in the proximal epithelial progenitors in the ductal region of E13.5 control SMGs (Fig. 6H arrow) (Lombaert et al., 2011). However, expression in the absence of *Sox9* was found throughout the epithelium including the tip of the truncated *Sox9<sup>CKO</sup>* endbud (Fig. 6I arrowhead) suggesting that normal differentiation can proceed in the absence of *Sox9* in the remaining proximal progenitors. Altogether, this data illustrates the differential requirement of *Sox9* for the formation of the distal progenitor as opposed to the proximal progenitors.

### Conserved dependence of *Type II collagen* on *Sox9* expression in salivary gland epithelium

In the mesenchyme, *Sox9* is part of a hierarchy of genes that control cartilage development (Bell et al., 1997). Some aspects of this pathway also appear conserved in epithelial tissues, for example with *Type II collagen* being expressed in lung and lacrimal gland epithelium (Rockich et al., 2013; Chen et al., 2014). We therefore aimed to test whether *Type II collagen* was also expressed in salivary gland epithelium. *Type II collagen* was observed in the salivary gland epithelium from E11.5, overlapping with *Sox9* expression (Fig. 7A compared to Fig. 1B). As with *Sox9*, *Type II collagen* was later restricted to the distal precursors (Fig. 7B). To test whether *Type II collagen* was dependent on *Sox9* we



assessed expression in our conditional mutants (Fig. 7C, D). In the absence of *Sox9*, *Type II collagen* expression was lost in the gland, suggesting a conserved relationship between these genes in both mesenchyme and epithelium (Fig. 7D).

To investigate whether the reduction of *Type II collagen* could contribute to the branching defect observed in the *Sox9<sup>CKO</sup>* mice, submandibular glands were treated *ex vivo* with collagenase for two days (Fig. 7E-H). Collagenase treatment did not increase apoptosis in the epithelium, indicating no or low cytotoxic effects at this concentration (Fig. 7E, F). However, in agreement with previous observations from later stages (Nakanishi et al., 1986), collagenase treatment resulted in a reduction in branch formation (Fig. 7G-H). Thus, disruption of *Type II collagen* in *Sox9<sup>CKO</sup>* salivary glands may contribute to the defect in epithelial branching morphogenesis.

### **Fgf10 maintains Sox9 expression through the Erk pathway during SMG development**

Since FgfR signalling positively regulates Sox9 in other developing branching organs (Seymour et al., 2012; Chang et al., 2013; Chen et al., 2014) we hypothesised that Fgf10 might play a similar role in the SMGs. In keeping with this, qPCR analysis has previously shown upregulation of *Sox9* after addition of Fgf7 or Fgf10 to wildtype epithelial rudiments of SMG at the pseudoglandular stage (Lombaert and Hoffman, 2010). We first examined the expression of *Fgf10* and *Sox9* at the SMG initiation stage by *in situ* hybridization (Fig. 8A-D). As previously described, *Fgf10* was expressed in the mesenchyme surrounding the site of placode formation (Fig. 8A, C) (Wells et al., 2013) while *Sox9* as we have shown, was specifically expressed at the site of the epithelial thickening (Fig. 8B, D). Given the similar temporal and spatial localisation of *Fgf10* and *Sox9*, we were interested to see whether this pattern correlates with a positive regulation. Thus, we examined the expression of *Sox9* in the *Fgf10-null* mice (Fig. 8E, H). *Fgf10-null* mice fail to develop a bud and their development is arrested at the placode stage (Jaskoll et al., 2005). *Sox9* was highly expressed in the bud of the *Fgf10<sup>+/+</sup>* SMGs but it was severely reduced in the developmentally arrested placodes of the E12.5 *Fgf10-null* SMGs. However, the mesenchymal expression of *Sox9* in Meckel's cartilage and in the ganglion remained at the same levels (Fig. 8E, H), suggesting *Sox9* in these tissues is not regulated by Fgf10. In addition, in keeping with the close relationship between *Sox9* and *Type II collagen*, expression of *Type II collagen* in the gland tissue was severely reduced at E12.5, with no effect on *Type II collagen* in the adjacent Meckel's cartilage (Fig. 8F,I). Loss of *Sox9* in the epithelium correlated with a reduction in the expression of *Spry1*, a readout of Erk signalling, suggesting that activation of *Sox9* by Fgf10 acts through the Erk pathway during these initial stages of SMG development (Fig. 8G,J).

To further study this positive regulation of *Sox9* by Fgf10 we moved to an explant culture system. Mandibles were sliced frontally and slices with SMGs were cultured for 24 hours (Fig. 9). In control cultures the salivary gland tissue developed from a thickening to a bud and exhibited high levels of *Sox9* (Fig. 9A-C). In contrast, slices cultured with SU5402, an inhibitor of the FgfR signalling pathway, failed to develop a fully formed bud and *Sox9* levels were undetectable (Fig. 9D-F), mimicking the *Fgf10* knockout phenotype. In contrast, *Sox9* levels were maintained at high levels in the cultures in the absence of Fgf signalling (Fig. 9C).

FgfR signals through several transduction pathways the most common of which is the RAS-Erk pathway (Thisse and Thisse, 2005). To investigate which pathway controls *Sox9* expression downstream of the FgfR we inhibited the Erk pathway using the MAPK inhibitor U0126. E11.0 mandible slices were treated for 1 day with U0126 while DMSO treated cultures were used as a control (Fig. 9G-I). Similar to the SU5402 treatment, the epithelium of the U0126 treated explants failed to form a fully developed bud (Fig. 9H) and to maintain *Sox9* expression (Fig. 9I) suggesting that FgfR signalling positively regulates *Sox9* through the Erk pathway.

Since Fgf10 is required to maintain Sox9 we were then interested to investigate whether exogenous Fgf10 treatment could restore Sox9 expression in *Fgf10-null* SMG epithelium (Fig. 9J-O). As an Fgf10 source we used heparin coated beads treated with Fgf10 to provide a localised supply of the protein (Fig. 9M, N), while BSA treated beads were used as a control (Fig. 9J, K). Beads were placed on E12.5 *Fgf10-null* mandible slices in culture and the expression of Sox9 was assessed (Fig. 9L, O). The level of Sox9 expression was rescued in the Fgf10-treated slices compared to controls (Fig. 9L, O), further supporting that Sox9 is positively regulated by Fgf10 in salivary glands.

### **Sox9 ablation does not lead to downregulation of *Etv5***

In the lacrimal glands, pancreas and kidney Sox9 is involved in a positive feedback loop with Fgf10 for further upregulation of FgfR signalling (Chen et al., 2014; Seymour et al., 2012; Reginensi et al., 2011), with *Etv5* expression, a downstream target of the FgfR signalling pathway, reduced in the Sox9 mutant. To test whether Sox9 plays a similar role in salivary glands we performed *in situ* hybridisation for *Etv5* (Fig. S4A, B) and also for *Fgf10* (Fig. S4C, D) on Sox9 mutant glands. Contrary to the development of other branching organs, no detectable difference was found between the mutants and control for both *Etv5* (Fig. S4A, B) and *Fgf10* (Fig. S4C, D), indicating that Sox9 does not act in a positive feedback loop with Fgf signalling in salivary glands. Salivary glands, therefore, appear to have distinct differences in FGFR signalling compared to other branching organs.

### **Discussion**

Sox9 is a transcription factor involved in the development of many branching organs including pancreas, lacrimal glands, lungs and kidneys. Although salivary glands are also branching organs, the role of Sox9 during their development has not previously been addressed. Here we have shown that Sox9 is expressed throughout the development of salivary glands from the salivary gland initiation stage to the fully differentiated adult salivary gland. These early Sox9-positive epithelial cells are the progenitors of the entire salivary gland epithelium. In order to assess Sox9 function, we used the *K14* promoter to specifically ablate epithelial Sox9 expression from the developing salivary glands. We demonstrated that Sox9 is required for salivary gland morphogenesis by promoting the formation of the distal epithelial progenitor population, the presence of which is essential for subsequent branching. Abnormal branching and gland formation was observed in all three major Sox9<sup>CKO</sup> glands, the submandibular, sublingual and parotid. Sox9 is therefore, required for the development of all three major salivary glands, irrespective of whether the gland was mucous or serous.

### **Sox9 is required for the formation of distal epithelial progenitors and branching morphogenesis**

Branching morphogenesis is a dynamic process that involves repetitive rounds of epithelial budding, clefting and epithelial outgrowth. This requires the coordination of different mechanisms, which includes extracellular matrix (ECM) deposition, migration and epithelial proliferation (Harunaga et al., 2011). We have shown here that the mechanism of branch formation can be driven by the distal part of the epithelium alone (endbud) without the need of the proximal (stalk) epithelium. The branching defect observed in the Sox9<sup>CKO</sup> salivary glands is related to a failure in the specification of the distal epithelial population. Despite subtle differences in clefting, which could be attributed to differences in the number of Sox9-positive cells that remained after recombination, all the Sox9<sup>CKO</sup> SMGs examined were arrested at the bud stage with an absence of distal markers, cMyb and Sox10. Interestingly this phenotype is specific to the salivary glands since Sox9 ablation in other branching organs leads either to complete agenesis (lacrimal glands) (Chen et al., 2014;) or to reduced branching (lungs, pancreas) (Chang et al., 2013; Rockich et al., 2013; Seymour et al., 2007) suggesting that the requirement for Sox9 during development is specific to the branching organ. Despite the tissue specific requirement for Sox9, we have shown that in salivary glands Sox9 can



regulate a similar subset of genes important for branching. This includes *Sox10* and *Type II collagen* that are also downregulated in the *Sox9<sup>CKO</sup>* lacrimal glands and lungs (Chen et al., 2014; Rockich et al., 2013).

Loss of Type II collagen expression could contribute to the arrest in branch formation observed in the *Sox9<sup>CKO</sup>* SMGs as reduction of collagens with collagenase treatment in culture led to a loss of branching. In keeping with this inhibition of collagenases has been shown to stimulate branching morphogenesis (Nakanishi et al., 1986). Our paper therefore provides a link between Sox9, distal progenitor formation and branching morphogenesis.

### **Fgf10 signalling positively regulates Sox9 expression through the Erk pathway**

Sox9 has a distinct proximo-distal expression pattern from early bud stages, however, at the placode stage it is expressed throughout the epithelium. This change in expression may be driven by the changing pattern of *Fgf10* expression, which becomes more focused around the distal part of the gland as it develops. In the *Fgf10-null*, expression of Sox9 was lost at the late placode stage. In culture Fgf7 has been shown to be able to strongly increase the expression levels of Sox9 (Lombaert and Hoffman, 2010), but *in vivo* Fgf10 appears to be the dominant Fgf for Sox9 expression. The *Fgf10-null*, however, had a more severe phenotype than the conditional Sox9 mutant with an arrest at the placode stage. Although some of the phenotype in the *Fgf10-null* might be generated by loss of Sox9, other genes are also likely to be affected. For example, inhibition of the Fgfr signalling influences the activity of Wnt and Bmp signalling (Patel et al., 2011; Knosp et al., 2015; Hoffman et al., 2002).

*Fgf10* heterozygous mice are viable but have been shown to have smaller salivary glands (May et al., 2015). Interestingly at E13.5 the *Sox9<sup>CHET</sup>* glands were smaller than the control littermates and had reduced numbers of branches, it would therefore be interesting to study whether the glands stay small or are rescued later in development.

In our culture experiments we were able to rescue the expression of Sox9 in *Fgf10-null* glands by addition of Fgf10 protein, with regulation of Sox9 by Fgf10 acting through the Erk pathway. Although loss of Sox9 has been associated with a subsequent loss of Fgfr signalling in many branching organs we saw no such reduction in the salivary glands (Chen et al., 2014; Seymour et al., 2012; Reginensi et al., 2011). This implies that a positive feedback loop between Sox9 and *Fgf10* is not a universal part of branching morphogenesis. In the lungs although *Etv5* is downregulated, *Fgf10* itself appeared to be upregulated (Chang et al., 2013). Again, we found no change in *Fgf10*, confirming that Sox9 does not appear to be able to influence Fgf signalling in salivary glands. Interestingly, while inhibition of Fgf10 and Erk signalling led to a loss of Sox9 in the gland epithelium no change in Sox9 expression was observed in the neighboring developing cartilage, showing that although some aspects of the cartilage pathway are preserved in the glands (Sox9 induction of Type II collagen) the specific involvement of Erk signaling is unique to the glands.

The current results lead us to introduce a working model in which mesenchymal Fgf10 via the Fgfr and Erk pathway, activates Sox9 expression in the epithelium. Sox9 promotes the formation and proliferation of distal epithelial progenitors, and in the absence of this population the gland is unable to undergo branching morphogenesis (Fig. 10). These results provide insights into the mechanisms of progenitor cell function underlying normal salivary gland morphogenesis and may prove useful in designing methods for regeneration of branching organs.

## Materials and methods

### Mouse strains and lineage tracing

*Sox9 floxed*, *Fgf10-null* and *K14-cre*, *Sox9-creERT2* and *Rosa-Tdtomato* mice have been previously described (Kist et al., 2002; Min et al., 1998; Vasioukhin et al., 1999; Soeda et al., 2010; Madisen et al., 2010). For the lineage tracing experiments 75 mg tamoxifen/kg body weight was administered interperitoneally into E10.5 pregnant mice. The day of the vaginal plug was estimated as day 0.5 of embryonic development. All procedures and culling methods were compliant with UK Home Office regulations and with the approval of the King's College London Biological Safety committee.

### Histology, Immunofluorescence and *in situ* hybridization

Tissue was embedded in paraffin as previously described (May et al., 2015). Immunofluorescence was performed either on paraffin embedded tissue or on whole mount dissected embryonic salivary glands and explant cultures. Primary antibodies and dilutions were used as follows: anti-Sox9 1:300 (AB5535, Millipore); anti-BrdU 1:500 (ab6326, Abcam); anti-Sox2 1:200 (#2748 Cell Signalling) anti-Mist1 1:50 (sc-98771, Santa Cruz Biotechnology), where signal was amplified with the TSA kit (Perkin Elmer); anti-laminin 1:300 (L9393, Sigma); anti-K5 1:300 (119-13621, Cambridge Bioscience); anti-Sox10 1:100 (sc-365692, Santa Cruz Biotechnology) with the TSA kit; anti-cleaved caspase 3 1:200 (#9661, Cell Signaling Technology). *In situ* hybridization was performed following a modified Wilkinson protocol (Wilkinson, 1995) as previously described on either paraffin embedded tissue or on whole mount dissected embryonic salivary glands and explant cultures.

### Proliferation and cell quantification analysis

For proliferation analysis 20mg BrdU per kg of pregnant mouse were injected 30min before harvesting. Tissue was then embedded in paraffin and processed for immunofluorescence. For BrdU immunofluorescence, samples were treated for 30min with 2M HCl at 40°C prior to the addition of primary antibody. The mean cell proliferation index (BrdU<sup>+</sup>/epithelial cells) for each gland was determined by analysing 3 different sections. For the cell quantification of epithelial progenitors the section passing through the middle of the gland was quantified. Cells were quantified manually using the cell counter plug in of Fiji/ImageJ (Schindelin et al., 2012). Results were plotted and statistically analysed using the Graph PadPrism software. Data was analysed using one-way Anova test apart from the cleft formation graph which was analysed using the Chi-squared test. For all the quantification experiments, at least three independent biological replicates were used. Significance was taken as  $P < 0.05$  (\*), or  $P < 0.01$  (\*\*),  $P < 0.001$  (\*\*\*)

### Explant culture

Mandibular slice cultures were performed as previously described (Li et al., 2015). For the bead experiment two types of beads were used to help distinguish between the control and treated condition. For the Fgf10 treated explants heparin beads (Sigma, 100-200mesh) were incubated overnight at 4°C with 100µg/ml Fgf10 (R&D systems). For the control Affi-Gel blue beads (Bio-Rad,153-7302) were treated with 0.5% BSA. For inhibiting the FgfR signalling or the Erk pathway, explant cultures were treated with 2.5µM SU5402 (Merck) or 5µM U0126 (Cell Signaling Technology) respectively made up in DMSO. Control cultures were treated with equivalent concentrations of DMSO, 0.25% DMSO for the SU5402 and 0.5% DMSO for the U0126 experiment. For the collagenase treatment, whole E12.5 submandibular glands were dissected and treated for 2 days with 1µg/ml collagenase, Type II (Thermo Fisher Scientific) while HBSS treated glands were

used as a control. Spooner ratios are calculated as the number of buds at the end of culture divided by the number of buds at the start of culture.

**Acknowledgements:**

We would like to thank Dr Karine Rizzoti for kindly providing us *Sox9-CreERT2* embryos, from a line that originated from the lab of Prof Haruhiko Akiyama. The *Sox9* floxed mice were obtained from MRC-Harwell, which distributes these mice on behalf of the European Mouse Mutant Archive ([www.emmanet.org](http://www.emmanet.org)). MRC-Harwell is also a member of the International Mouse Phenotyping Consortium (IMPC). Funding and associated primary phenotypic information may be found at [www.mousephenotype.org](http://www.mousephenotype.org).

**Competing interests:** No competing interests declared

**Author contributions:** Experiments were designed by all the authors and performed by L.C. and M.G. The manuscript was written by all the authors.

**Funding:** This work was funded by the Anatomical Society, the Wellcome Trust [102889/Z/13/Z to A.S.T] and the Fondecyt of Initiation into Research, Government of Chile [11140303 to M.G].

## References

- Abler, L. L., Mansour, S. L. and Sun, X.** (2009). Conditional gene inactivation reveals roles for Fgf10 and Fgfr2 in establishing a normal pattern of epithelial branching in the mouse lung. *Dev. Dyn.* **238**, 1999-2013.
- Affolter, M., Bellusci, S., Itoh, N., Shilo, B., Thiery, J. P. and Werb, Z.** (2003). Tube or not tube: remodeling epithelial tissues by branching morphogenesis. *Dev. Cell.* **4**, 11-18.
- Arnold, K., Sarkar, A., Yram, M. A., Polo, J. M., Bronson, R., Sengupta, S., Seandel, M., Geijsen, N. and Hochedlinger, K.** (2011). Sox2(+) adult stem and progenitor cells are important for tissue regeneration and survival of mice. *Cell Stem Cell* **9**, 317-329.
- Aure, M. H., Konieczny, S. F. and Ovitt, C. E.** (2015). Salivary gland homeostasis is maintained through acinar cell self-duplication. *Dev. Cell* **33**, 231-237.
- Bell, D. M., Leung, K. K., Wheatley, S. C., Ng, L. J., Zhou, S., Ling, K. W., Sham, M. H., Koopman, P., Tam, P. P. and Cheah, K. S.** (1997). SOX9 directly regulates the type-II collagen gene. *Nat. Genet.* **16**, 174-178.
- Chang, D. R., Martinez Alanis, D., Miller, R. K., Ji, H., Akiyama, H., McCrea, P. D. and Chen, J.** (2013). Lung epithelial branching program antagonizes alveolar differentiation. *Proc. Natl. Acad. Sci. U. S. A.* **110**, 18042-18051.
- Chen, Z., Huang, J., Liu, Y., Dattilo, L. K., Huh, S. H., Ornitz, D. and Beebe, D. C.** (2014). FGF signaling activates a Sox9-Sox10 pathway for the formation and branching morphogenesis of mouse ocular glands. *Development* **141**, 2691-2701.
- Harunaga, J., Hsu, J. C. and Yamada, K. M.** (2011). Dynamics of salivary gland morphogenesis. *J. Dent. Res.* **90**, 1070-1077.
- Hashimoto, S., Chen, H., Que, J., Brockway, B. L., Drake, J. A., Snyder, J. C., Randell, S. H. and Stripp, B. R.** (2012).  $\beta$ -Catenin-SOX2 signaling regulates the fate of developing airway epithelium. *J. Cell Sci.* **125**, 932-942.
- Hoffman, M. P., Kidder, B. L., Steinberg, Z. L., Lakhani, S., Ho, S., Kleinman, H. K. and Larsen, M.** (2002). Gene expression profiles of mouse submandibular gland development: FGFR1 regulates branching morphogenesis in vitro through BMP- and FGF-dependent mechanisms. *Development* **129**, 5767-5778.
- Ikegami, D., Akiyama, H., Suzuki, A., Nakamura, T., Nakano, T., Yoshikawa, H. and Tsumaki, N.** (2011). Sox9 sustains chondrocyte survival and hypertrophy in part through Pik3ca-Akt pathways. *Development* **138**, 1507-1519.
- Jaskoll, T., Abichaker, G., Witcher, D., Sala, F. G., Bellusci, S., Hajihosseini, M. K. and Melnick, M.** (2005). FGF10/FGFR2b signaling plays essential roles during in vivo embryonic submandibular salivary gland morphogenesis. *B. M. C. Dev. Biol.* **5**, 11.
- Jaskoll, T., Zhou, Y. M., Chai, Y., Makarenkova, H. P., Collinson, J. M., West, J. D., Hajihosseini, M. K., Lee, J. and Melnick, M.** (2002). Embryonic submandibular gland morphogenesis: stage-specific protein localization of FGFs, BMPs, Pax6 and Pax9 in normal mice and abnormal SMG phenotypes in FgfR2-IIIc(+/-Delta), BMP7(-/-) and Pax6(-/-) mice. *Cells Tissues Organs* **170**, 83-98.
- Kist, R., Schrewe, H., Balling, R. and Scherer, G.** (2002). Conditional inactivation of Sox9: a mouse model for campomelic dysplasia. *Genesis* **32**, 121-123.
- Knosp, W. M., Knox, S. M. and Hoffman, M. P.** (2012). Salivary gland organogenesis. *Wiley Interdiscip. Rev. Dev. Biol.* **1**, 69-82.
- Knosp, W. M., Knox, S. M., Lombaert, I. M., Haddox, C. L., Patel, V. N. and Hoffman, M. P.** (2015). Submandibular parasympathetic gangliogenesis requires sprouty-dependent Wnt signals from epithelial progenitors. *Dev. Cell* **32**, 667-677.

- Knox, S. M., Lombaert, I. M., Reed, X., Vitale-Cross, L., Gutkind, J. S. and Hoffman, M. P.** (2010). Parasympathetic innervation maintains epithelial progenitor cells during salivary organogenesis. *Science* **329**, 1645-1647.
- Li, J., Chatzeli, L., Panousopoulou, E., Tucker, A. S. and Green, J. B.** (2016). Epithelial stratification and placode invagination are separable functions in early morphogenesis of the molar tooth. *Development* **143**, 670-681.
- Lombaert, I. M. and Hoffman, M. P.** (2010). Epithelial stem/progenitor cells in the embryonic mouse submandibular gland. *Front. Oral Biol.* **14**, 90-106.
- Lombaert, I. M., Abrams, S. R., Li, L., Eswarakumar, V. P., Sethi, A. J., Witt, R. L. and Hoffman, M. P.** (2013). Combined KIT and FGFR2b signaling regulates epithelial progenitor expansion during organogenesis. *Stem Cell Reports* **1**, 604-619.
- Lombaert, I. M., Knox, S. M. and Hoffman, M. P.** (2011). Salivary gland progenitor cell biology provides a rationale for therapeutic salivary gland regeneration. *Oral Dis.* **17**, 445-449.
- Madisen, L., Zwingman, T. A., Sunkin, S. M., Oh, S. W., Zariwala, H. A., Gu, H., Ng, L. L., Palmiter, R. D., Hawrylycz, M. J., Jones, A. R., Lein, E. S. and Zeng, H.** (2010) A robust and high-throughput Cre reporting and characterization system for the whole mouse brain. *Nat. Neurosci.* **13**, 133-40.
- Matsumoto, S., Kurimoto, T., Taketo, M. M., Fujii, S. and Kikuchi, A.** (2016). The WNT/MYB pathway suppresses KIT expression to control the timing of salivary proacinar differentiation and duct formation. *Development* **143**, 2311-2324.
- May, A. J., Chatzeli, L., Proctor, G. B. and Tucker, A. S.** (2015). Salivary Gland Dysplasia in Fgf10 Heterozygous Mice: A New Mouse Model of Xerostomia. *Curr. Mol. Med.* **15**, 674-682.
- Min, H., Danilenko, D. M., Scully, S. A., Bolon, B., Ring, B. D., Tarpley, J. E., DeRose, M. and Simonet, W. S.** (1998). Fgf-10 is required for both limb and lung development and exhibits striking functional similarity to Drosophila branchless. *Genes Dev.* **12**, 3156-3161.
- Nakanishi, Y., Sugiura, F., Kishi, J. and Hayakawa, T.** (1986) Collagenase inhibitor stimulates cleft formation during early morphogenesis of mouse salivary gland. *Dev Biol.* **113**, 201-6.
- Ohuchi, H., Hori, Y., Yamasaki, M., Harada, H., Sekine, K., Kato, S. and Itoh, N.** (2000). FGF10 acts as a major ligand for FGF receptor 2 IIIb in mouse multi-organ development. *Biochem. Biophys. Res. Commun.* **277**, 643-649.
- Patel, N., Sharpe, P. T. and Miletich, I.** (2011). Coordination of epithelial branching and salivary gland lumen formation by Wnt and FGF signals. *Dev. Biol.* **358**, 156-167.
- Pritchett, J., Athwal, V., Roberts, N., Hanley, N. A. and Hanley, K. P.** (2011). Understanding the role of SOX9 in acquired diseases: lessons from development. *Trends Mol. Med.* **17**, 166-174.
- Reginensi, A., Clarkson, M., Neirijnck, Y., Lu, B., Ohyama, T., Groves, A. K., Sock, E., Wegner, M., Costantini, F., Chaboissier, M. C. and Schedl, A.** (2011). SOX9 controls epithelial branching by activating RET effector genes during kidney development. *Hum. Mol. Genet.* **20**, 1143-1153.
- Rockich, B. E., Hrycaj, S. M., Shih, H. P., Nagy, M. S., Ferguson, M. A., Kopp, J. L., Sander, M., Wellik, D. M. and Spence, J. R.** (2013). Sox9 plays multiple roles in the lung epithelium during branching morphogenesis. *Proc. Natl. Acad. Sci. U. S. A.* **110**, E4456-4464.
- Schindelin, J., Arganda-Carreras, I., Frise, E., Kaynig, V., Longair, M., Pietzsch, T., Preibisch, S., Rueden, C., Saalfeld, S., Schmid, B., Tinevez, J. Y., White, D.J., Hartenstein, V., Eliceiri, K., Tomancak, P. and Cardona, A.** (2012). Fiji: an open-source platform for biological-image analysis. *Nature methods* **9**, 676-682.
- Seymour, P. A., Freude, K. K., Tran, M. N., Mayes, E. E., Jensen, J., Kist, R., Scherer, G. and Sander, M.** (2007). SOX9 is required for maintenance of the pancreatic progenitor cell pool. *Proc. Natl. Acad. Sci. U. S. A.* **104**, 1865-1870.
- Seymour, P. A., Shih, H. P., Patel, N. A., Freude, K. K., Xie, R., Lim, C. J. and Sander, M.** (2012). A Sox9/Fgf feed-forward loop maintains pancreatic organ identity. *Development* **139**, 3363-3372.

- Soeda, T., Deng, J. M., de Crombrughe, B., Behringer, R. R., Nakamura, T. and Akiyama, H.** (2010) Sox9-expressing precursors are the cellular origin of the cruciate ligament of the knee joint and the limb tendons. *Genesis*. **48**, 635-44.
- Steinberg, Z., Myers, C., Heim, V. M., Lathrop, C. A., Rebustini, I. T., Stewart, J. S., Larsen, M. and Hoffman, M. P.** (2005). FGFR2b signaling regulates ex vivo submandibular gland epithelial cell proliferation and branching morphogenesis. *Development* **132**, 1223-1234.
- Teshima, T. H., Lourenço, S. V. and Tucker, A. S.** (2016). Multiple cranial organ defects after conditionally knocking out Fgf10 in the neural crest. *Front. Physiol.* doi: 10.3389/fphys.2016.00488.
- Teshima, T. H., Wells, K. L., Lourenço, S. V. and Tucker, A. S.** (2016). Apoptosis in Early Salivary Gland Duct Morphogenesis and Lumen Formation. *J. Dent. Res.* **95**, 277-283.
- Thisse, B. and Thisse, C.** (2005). Functions and regulations of fibroblast growth factor signaling during embryonic development. *Dev. Biol.* **287**, 390-402.
- Tucker, A. S.** (2007). Salivary gland development. *Semin. Cell Dev. Biol.* **18**, 237-44.
- Vasioukhin, V., Degenstein, L., Wise, B. and Fuchs, E.** (1999). The magical touch: genome targeting in epidermal stem cells induced by tamoxifen application to mouse skin. *Proc. Natl. Acad. Sci. U. S. A.* **96**, 8551-8556.
- Wagner, T., Wirth, J., Meyer, J., Zabel, B., Held, M., Zimmer, J., Pasantes, J., Bricarelli, F. D., Keutel, J., Hustert, E., Wolf, U., Tommerup, N., Schempp, W. and Scherer, G.** (1994). Autosomal sex reversal and campomelic dysplasia are caused by mutations in and around the SRY-related gene SOX9. *Cell* **79**, 1111-1120.
- Walker, J. L., Menko, A. S., Khalil, S., Rebustini, I., Hoffman, M. P., Kreidberg, J. A. and Kukuruzinska, M. A.** (2008). Diverse roles of E-cadherin in the morphogenesis of the submandibular gland: insights into the formation of acinar and ductal structures. *Dev. Dyn.* **237**, 3128-3141.
- Wells, K. L., Gaete, M., Matalova, E., Deutsch, D., Rice, D. and Tucker, A. S.** (2013). Dynamic relationship of the epithelium and mesenchyme during salivary gland initiation: the role of Fgf10. *Biol. Open* **2**, 981-989.
- Wilkinson, D. G.** (1995). *In Situ Hybridisation: A Practical Approach*. Oxford, UK: Oxford University Press.
- Zhao, Q., Eberspaecher, H., Lefebvre, V. and De Crombrughe, B.** (1997) Parallel expression of Sox9 and Col2a1 in cells undergoing chondrogenesis. *Dev Dyn.* **209**, 377-86.



## Figures

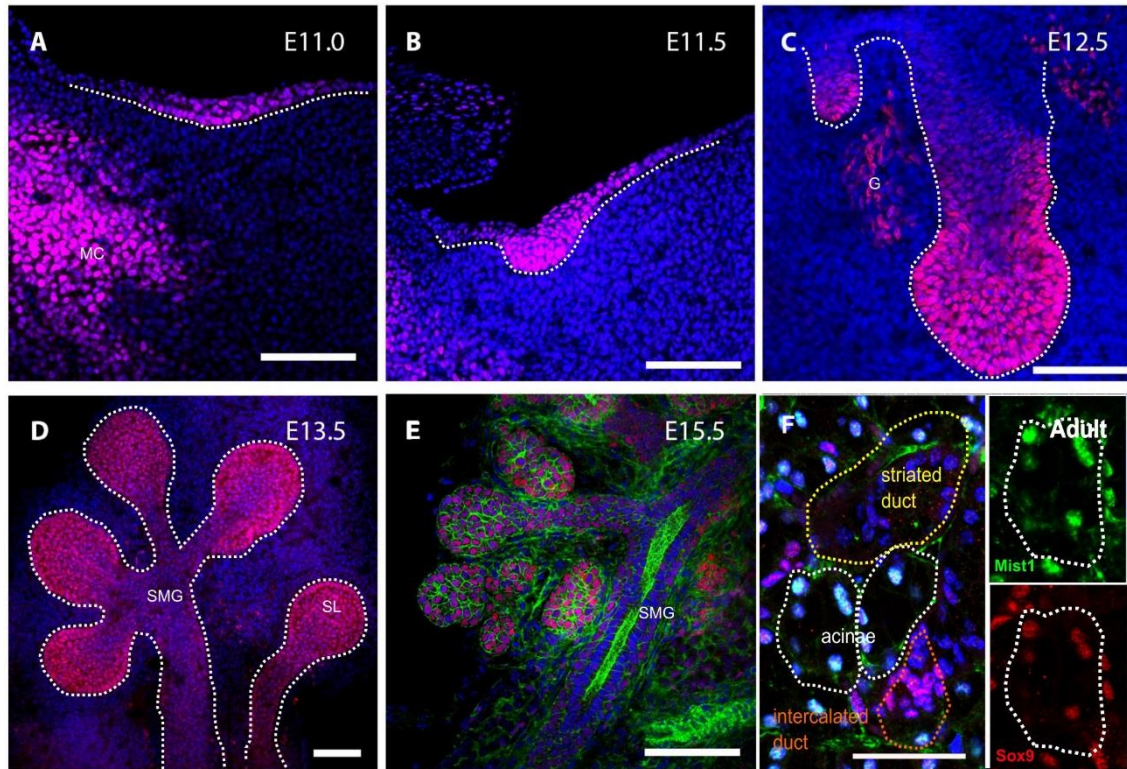

**Figure 1. Sox9 is expressed throughout the development of submandibular gland.** Sox9 immunofluorescence (red) at the placode [E11.0 (A), E11.5 (B)], initial bud [E12.5 (C)], pseudoglandular [E13.5 (D)], canalicular [E15.5 (E)] and adult stage (F). Blue stains DNA (DAPI), yellow F-actin and green Mist1. G: ganglion, SMG: submandibular gland, SL: sublingual gland, Mc: Meckel's cartilage. Scale bars: 100μm

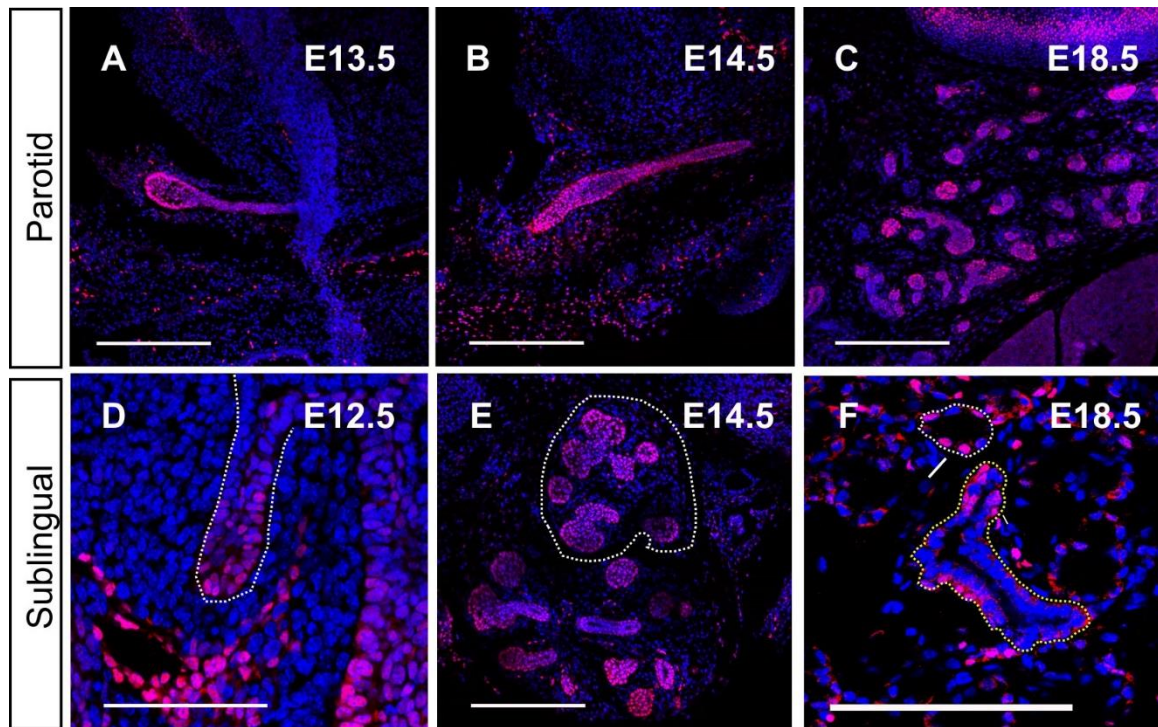

**Figure 2. Sox9 expression in the parotid and sublingual gland is similar to the submandibular.** Sox9 immunofluorescence (red) in the parotid (A-C) and sublingual (D-F) glands at the bud stage (A, D) and at E14.5 (B, E) and E18.5 (C, F). Dotted white lines in D and E outline the sublingual glands. The white dotted line in F outlines an acinus and the yellow a duct. Arrow points to Sox9<sup>+</sup> cells in the acinus and the arrowhead points to Sox9<sup>+</sup> cells in the duct. Blue stains DNA (DAPI). Scale bars in A, B, C, E and F are 250µm. Scale bar in D is 50µm.

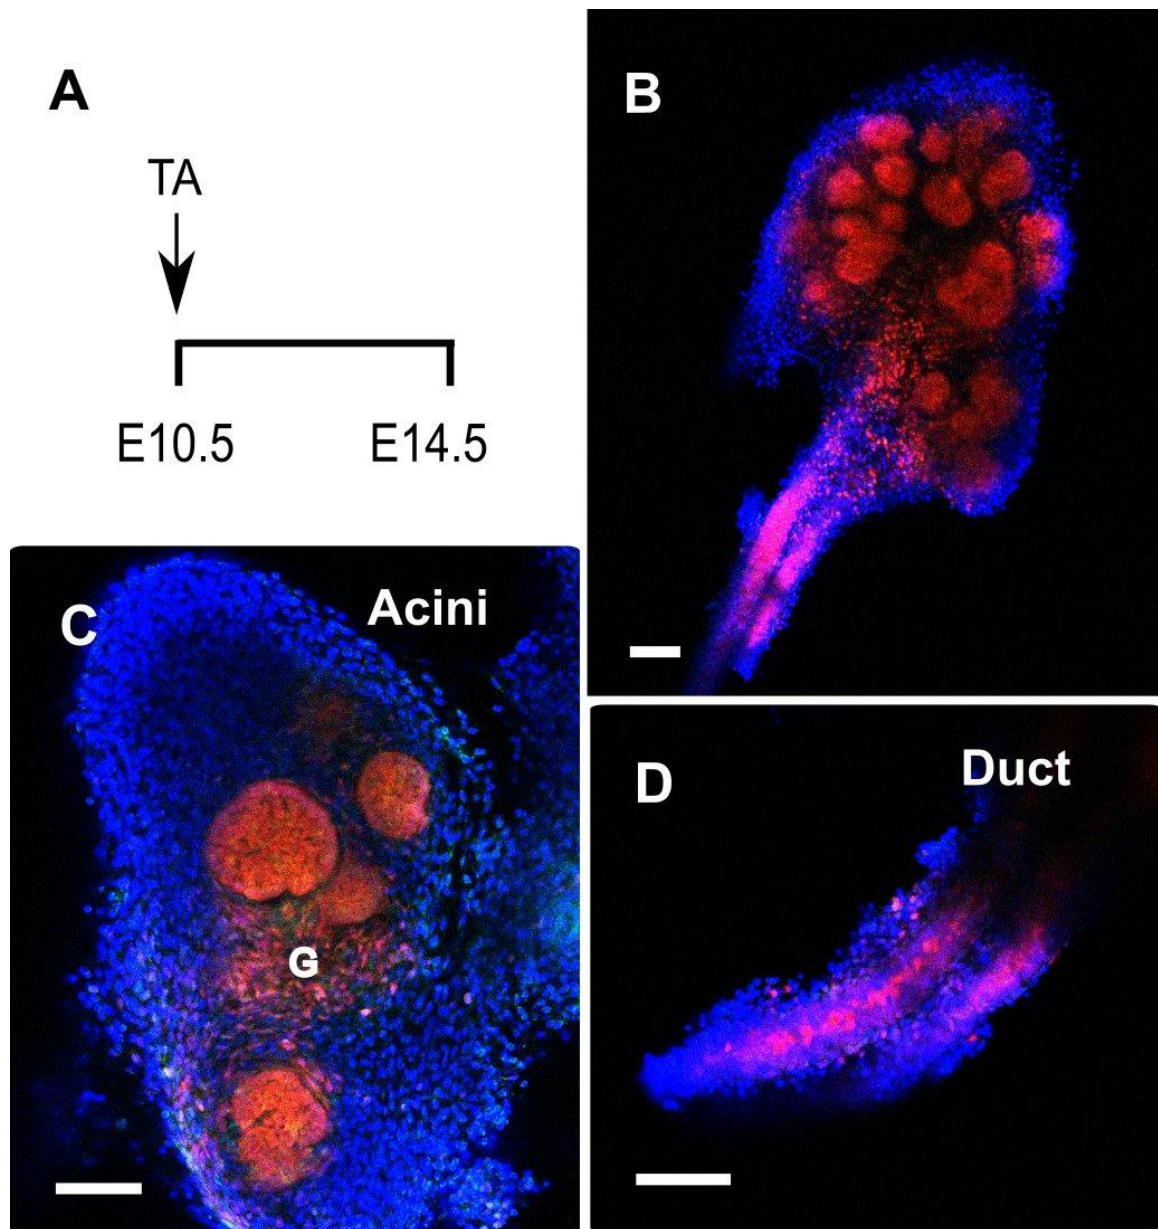

**Figure 3. Sox9-positive cells are progenitors of the entire submandibular gland epithelium.** A: experimental strategy used to follow the progeny of Sox9 expressing cells with the *Sox9-creERT2; R26-tdtomato* line. Tamoxifen was given at E10.5 and embryos were collected at E14.5. B-D: Tomato labelled cells (red) detected in the whole submandibular gland at E14.5, (B) in the acini (C) and duct (D). G: ganglion. Scale bars: 100 $\mu$ m.



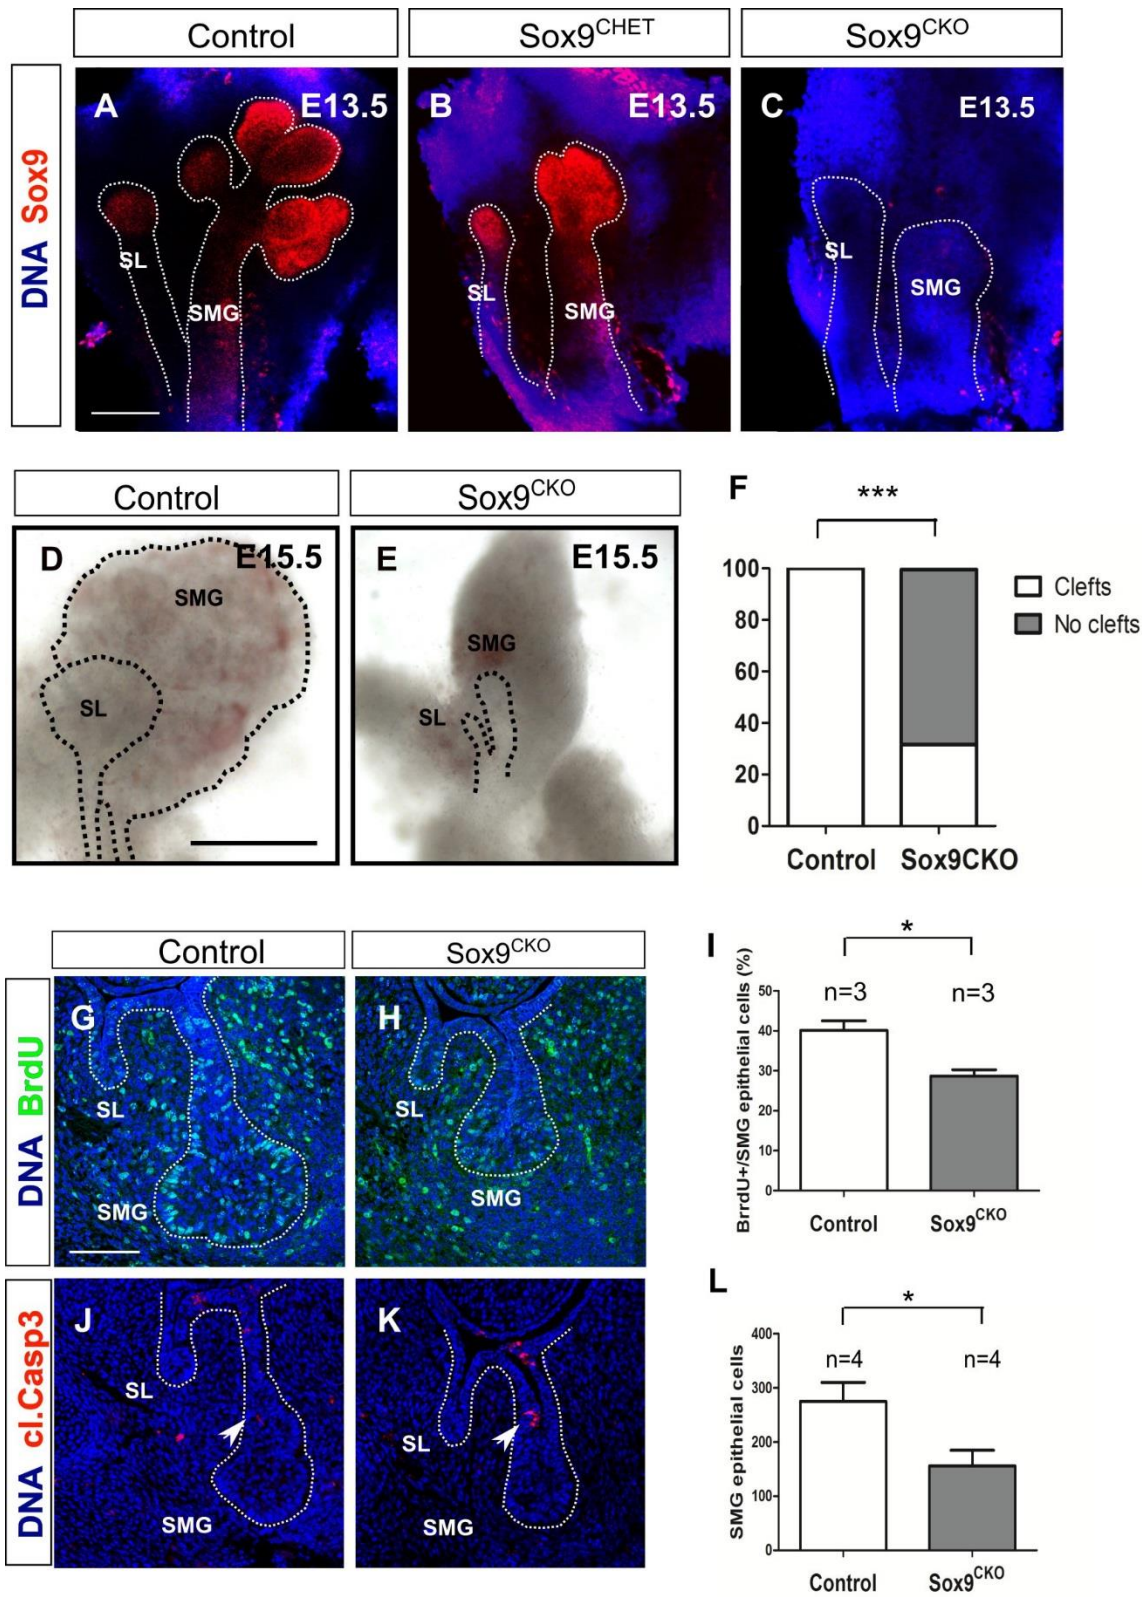

**Figure 4. Sox9 is required for branching morphogenesis.** A-C: Sox9 immunofluorescence (red) in the control (A), *Sox9<sup>CHET</sup>* (B) and *Sox9<sup>CKO</sup>* (C) at the pseudoglandular stage (E13.5). A: Scale bar 200µm (same scale in B,C). (D,E) Submandibular and sublingual glands dissected from control (D) and

*Sox9<sup>CKO</sup>* (E) mice at E15.5. Scale bar 500 $\mu$ m. (F) Quantification of cleft formation in the control and *Sox9<sup>CKO</sup>* submandibular glands at the pseudoglandular stage (E13.5). 'n' equals the number of submandibular glands. \*\*\* $P < 0.0001$ . (G, H) BrdU immunofluorescence (green) in the control (G), and *Sox9<sup>CKO</sup>* (H) submandibular glands at the bud stage E12.5. Scale bar 100 $\mu$ m. (I) Quantification of the ratio of epithelial BrdU<sup>+</sup> cells in the control and *Sox9<sup>CKO</sup>* submandibular glands at the bud stage (E12.5). (J, K) Cleaved caspase 3 immunofluorescence (red) in control and *Sox9<sup>CKO</sup>* submandibular glands at the bud stage (E12.5). Arrows indicate apoptotic cells at the stalk region. Scale bar: 100 $\mu$ m. (L) Quantification of epithelial cell number in control and *Sox9<sup>CKO</sup>* submandibular glands at the bud stage (E12.5). Error bars in I and L represent SEM, \* $P < 0.05$ . DNA is in blue (DAPI) for A-C, G, H, J, K. SMG: submandibular gland, SL: sublingual gland.

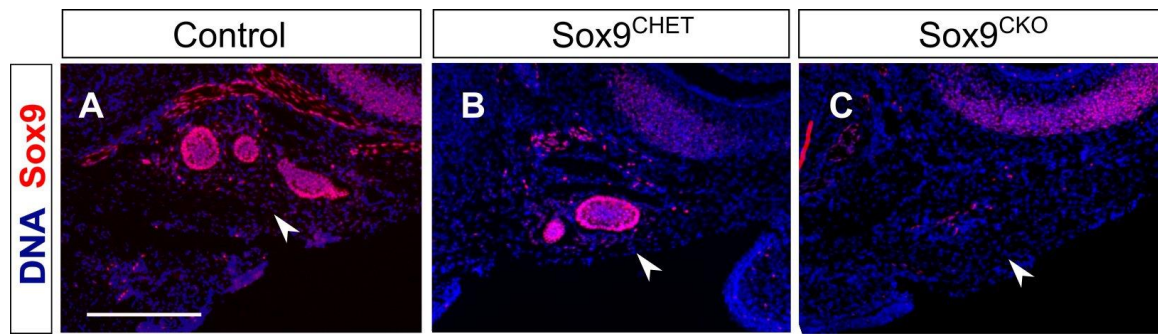

**Figure 5. Sox9 is required for parotid gland development.** Sox9 immunofluorescence (red) in the control (A), *Sox9<sup>CHET</sup>* (B), and *Sox9<sup>CKO</sup>* (C) parotid glands at E15.5. Arrowheads indicate the position of the parotid gland. Blue stains DNA (DAPI). Scale bar: 250 $\mu$ m.



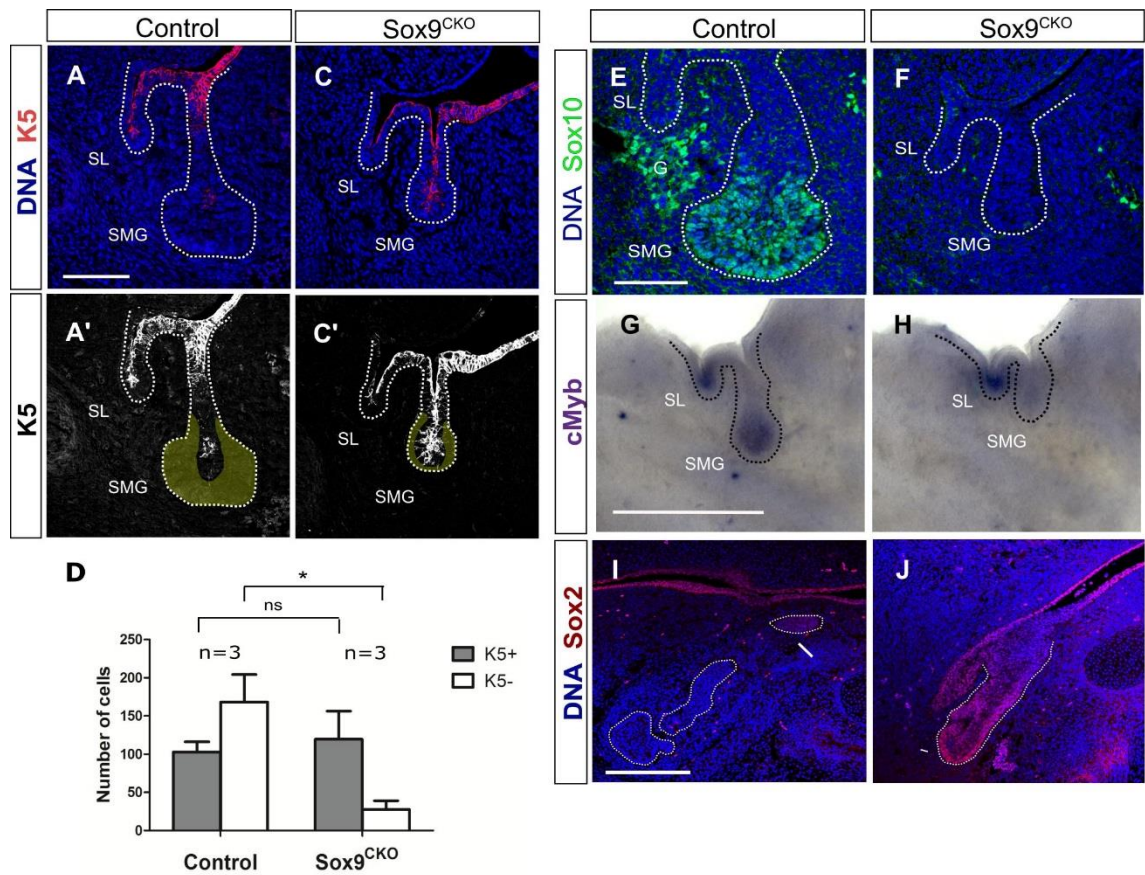

**Figure 6. Sox9 is required for the specification of distal epithelial progenitors.** (A-B') Immunofluorescence for cytokeratin 5 (K5) (red) in the control (A, A') and *Sox9*<sup>CKO</sup> (B, B') submandibular glands at the bud stage (E12.5). Yellow area in A'-B' represent the K5 negative (K5-) distal epithelial cells. Scale bar 100 $\mu$ m. (C) Total number of K5-positive (K5<sup>+</sup>) and K5-negative (K5-) epithelial cells in the control and *Sox9*<sup>CKO</sup> submandibular glands at the bud stage (E12.5). P<0.01. (D, E) Immunofluorescence for Sox10 (green) in the control (D) and *Sox9*<sup>CKO</sup> (E) submandibular glands at the bud stage (E12.5). Scale bar 50 $\mu$ m. (F-G) *in situ* for *cMyb* (Scale bar 500 $\mu$ m) in the control (F) and *Sox9*<sup>CKO</sup> (G) submandibular glands at the bud stage (E12.5). (H, I) Immunofluorescence for Sox2 in the control (H) and *Sox9*<sup>CKO</sup> (I) submandibular glands at the pseudoglandular stage (E13.5). Scale bar 100 $\mu$ m. DNA (DAPI) is in blue in A-B and D-I. SMG: submandibular gland, SL: sublingual gland, G: ganglion.

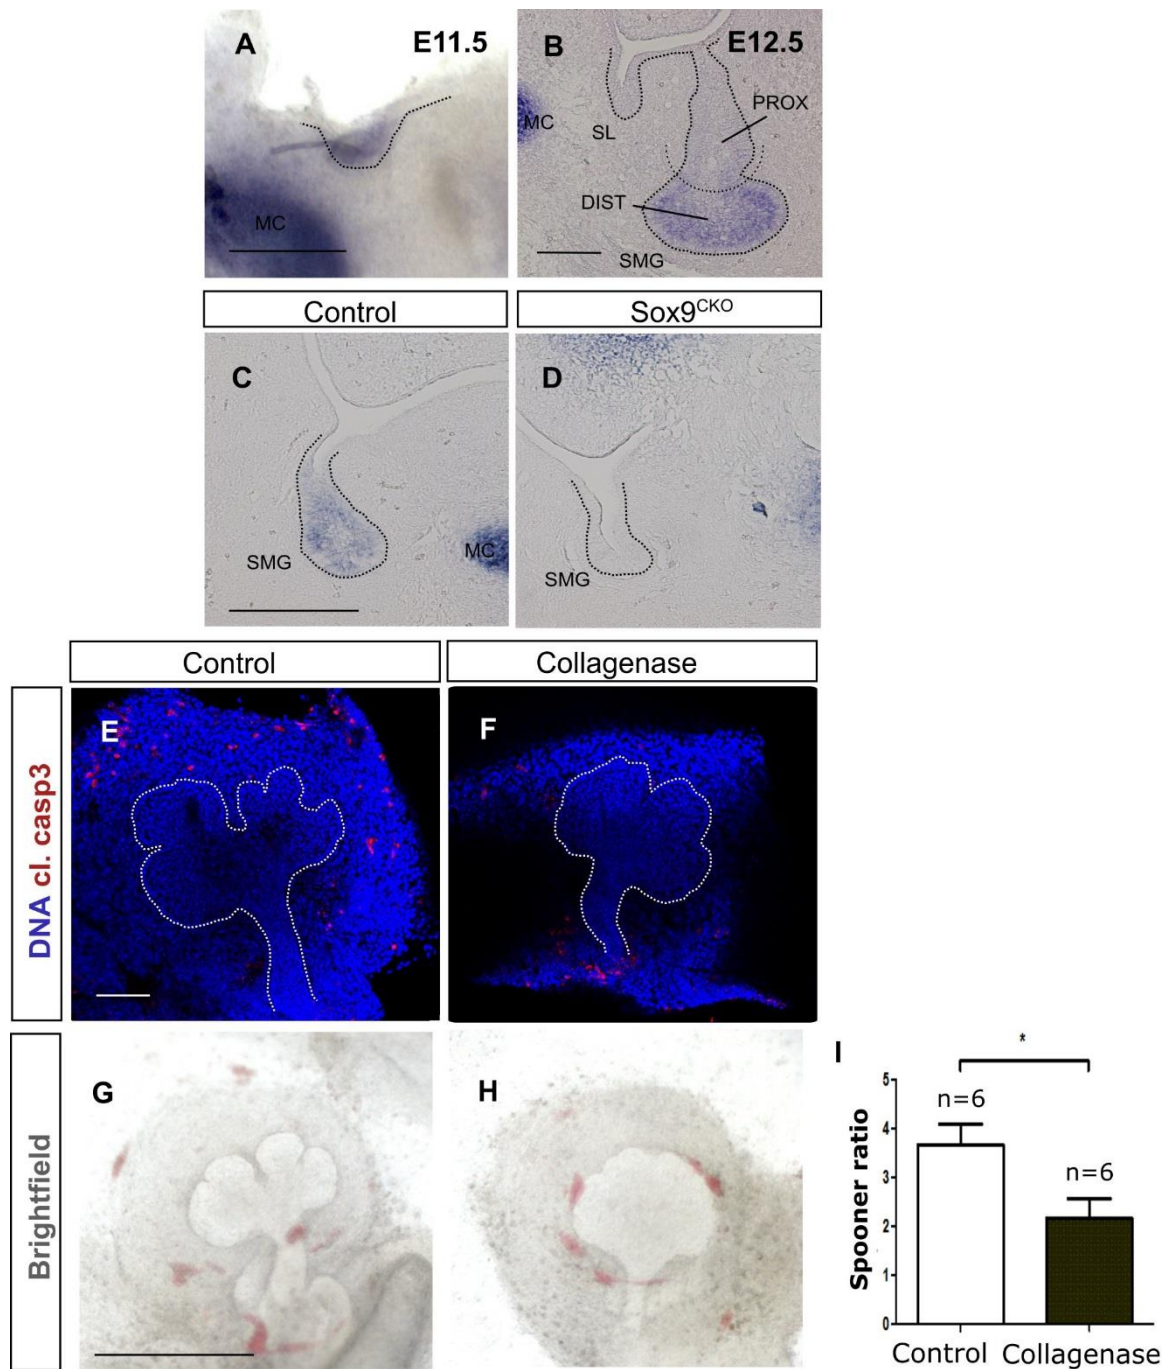

**Figure 7. Type II collagen (*Col2*) is expressed in the distal progenitors and acts downstream of *Sox9* possibly by contributing to branching. (A, B) *In situ* hybridisation for *Col2* at the placode (A) and bud stage (B). Scale bar in A is 250µm and in B is 50µm. (C, D) *In situ* hybridisation for *Col2* at the bud stage (E12.5) in the control (C) and *Sox9*<sup>CKO</sup> (D) submandibular glands. Scale bar: 100µm. (E, F) Immunofluorescence for cleaved caspase 3 (red) in control (E) and collagenase treated (F) submandibular gland explants. Blue stains DNA (DAPI) Scale bar: 100µm. (G, H) Brightfield images of control (G) and collagenase (H) treated submandibular gland explants. Scale bar 500µm. (I) Spooner ratio of the number of bud produced in the control and collagenase treated submandibular gland explants.**

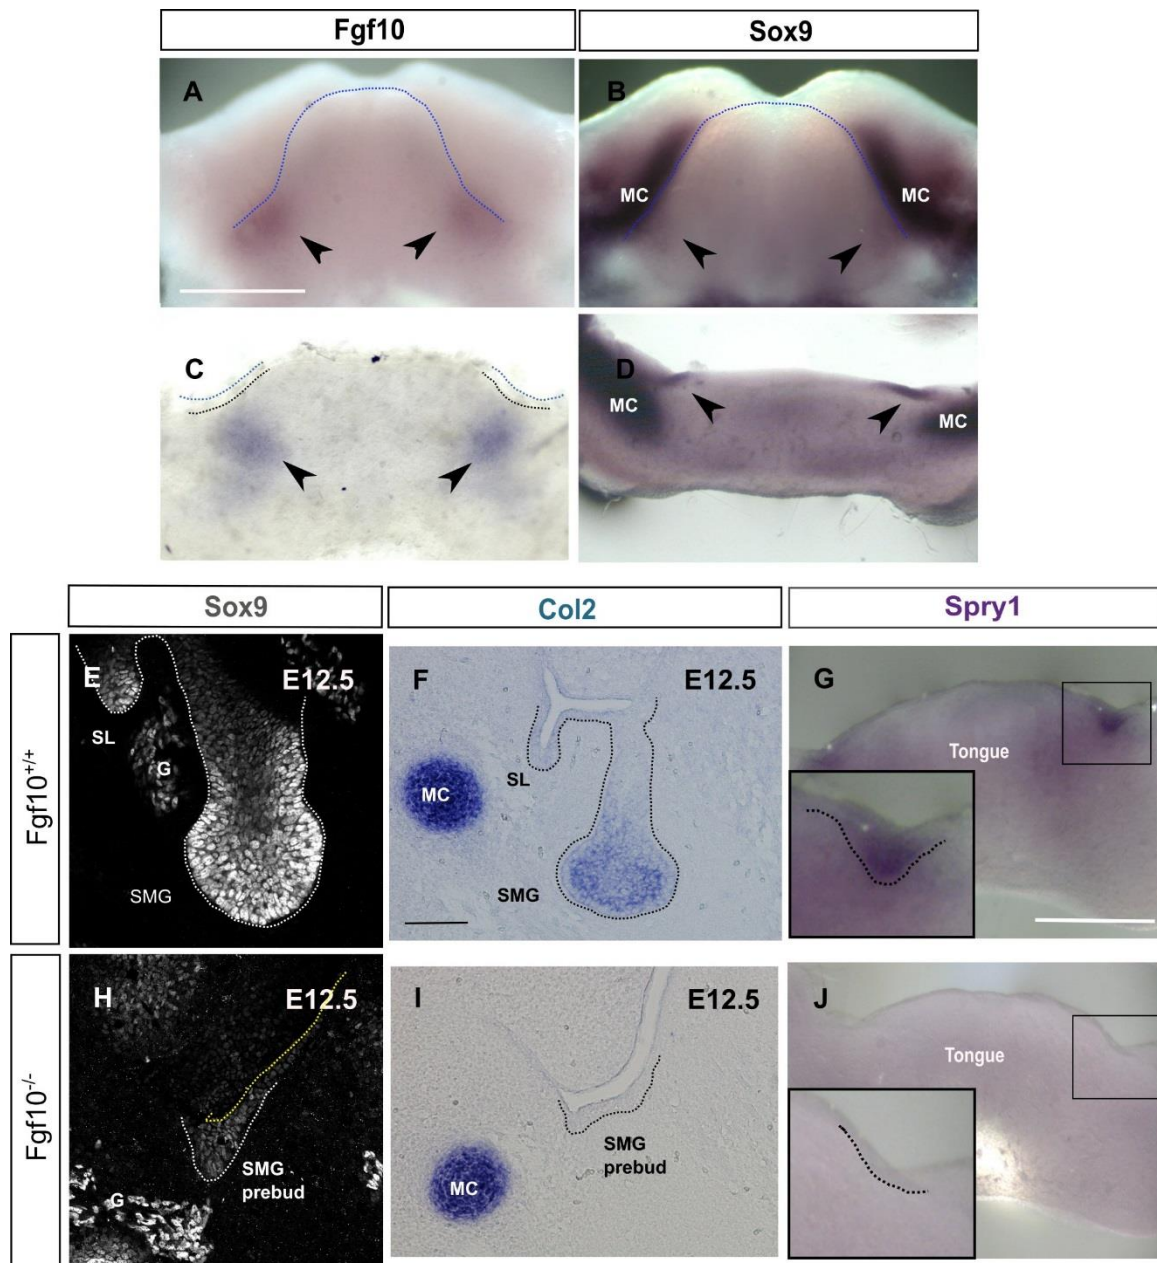

**Figure 8. Fgf10 maintains Sox9 expression during the initial stages of salivary gland development.** (A-D) *in situ* hybridization for Fgf10 (A, C) and Sox9 (B, D) on E11.0 mandibles (A, B) and frontal mandibular slices (C, D). Arrowheads indicate the site of expression in submandibular glands. Scale bar 500µm. (E, H) immunofluorescence for Sox9 in *Fgf10<sup>+/+</sup>* and *Fgf10<sup>-/-</sup>* submandibular glands at E12.5. Scale bar 50µm. (F-J) *in situ* hybridization for *Col2* (F, I) (scale bar 100µm) and *Spry1* (G, J) (scale bar 500µm) in *Fgf10<sup>+/+</sup>* (F, G) and *Fgf10<sup>-/-</sup>* (I, J) submandibular glands. SMG: submandibular gland, SL: sublingual gland, G: ganglion, Mc: Meckel's.



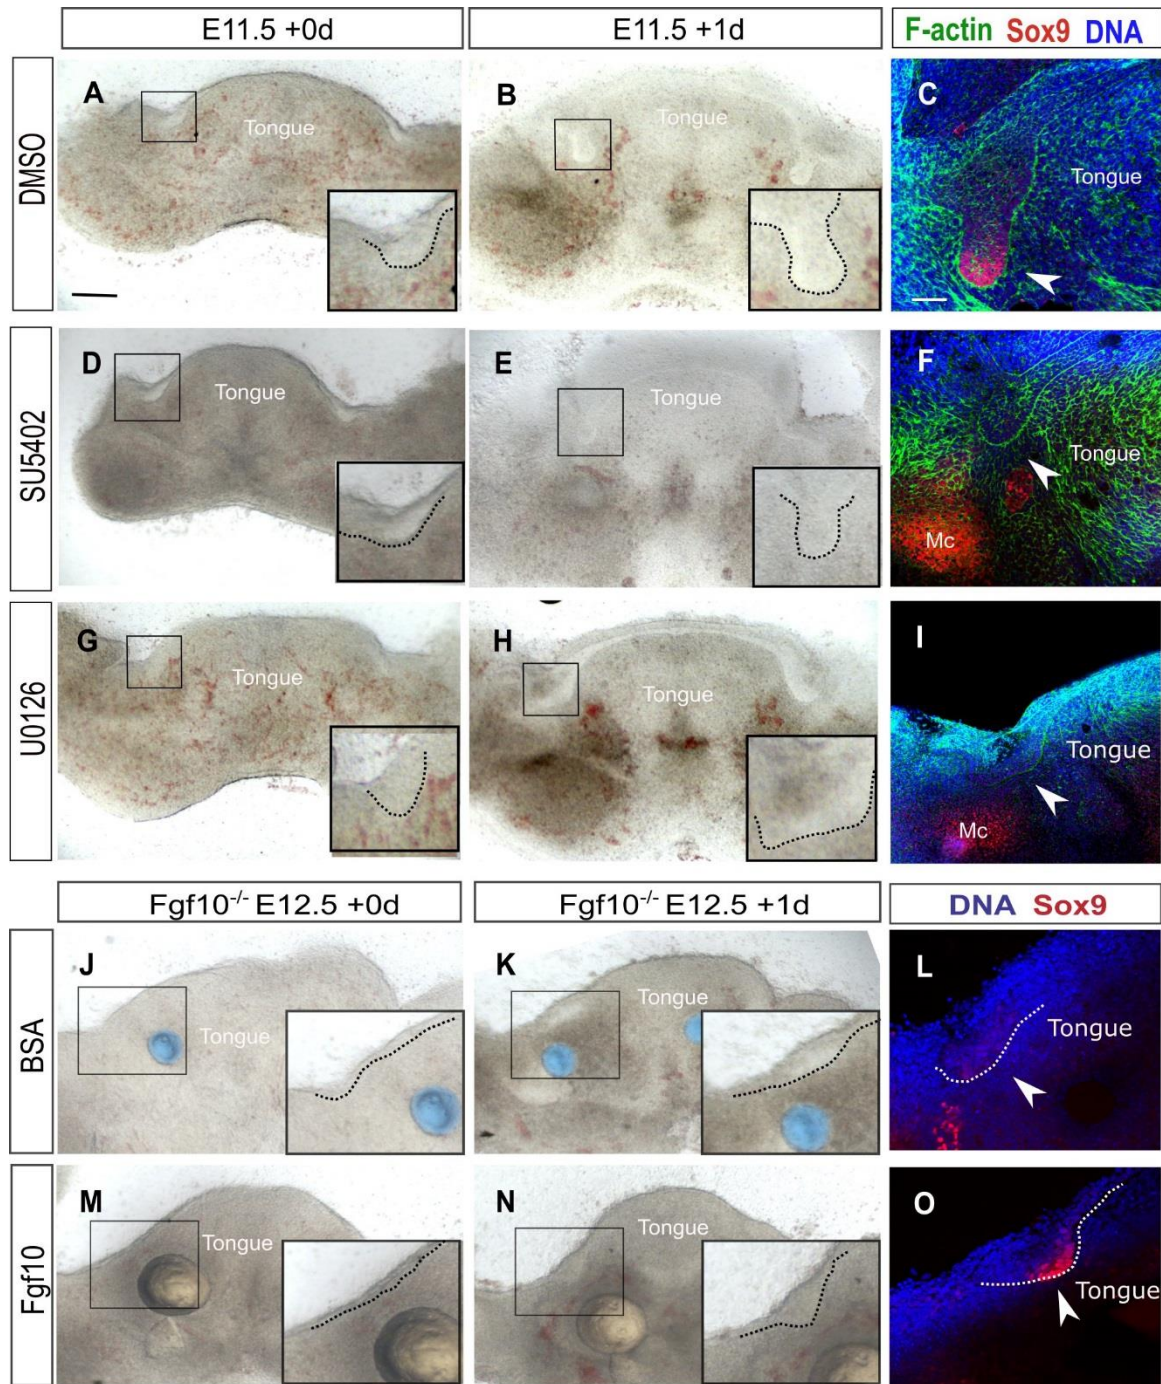

**Figure 9. FgfR signalling maintains Sox9 expression through the Erk pathway.** (A, B, D, E, G, H) Brightfield images of wild type mandibular slice cultures treated with DMSO (A, B), the FgfR inhibitor SU5402 (D, E) and the Erk inhibitor U0126 (G, H). (C, F, I) immunofluorescence for Sox9 (red) and F-actin (green) in DMSO (C), SU5402 (F) and U0126 (I) treated mandibular slice cultures. (J, K, M, N) Brightfield images of *Fgf10*<sup>-/-</sup> mandibular slice cultures treated with BSA treated beads (blue) (J, K) or Fgf10 treated beads (pale yellow) (M, N). (L, O) Immunofluorescence for Sox9 in *Fgf10*<sup>-/-</sup> mandibles treated with BSA treated beads (L) or Fgf10 treated beads (O). Blue in C, F, I, J, L and O stains the

DNA (DAPI). Boxes indicate the placode of the developing submandibular glands. Dotted lines outline the epithelium of the placodes. Arrowheads indicate the submandibular glands. Scale bars: 200 $\mu$ m.

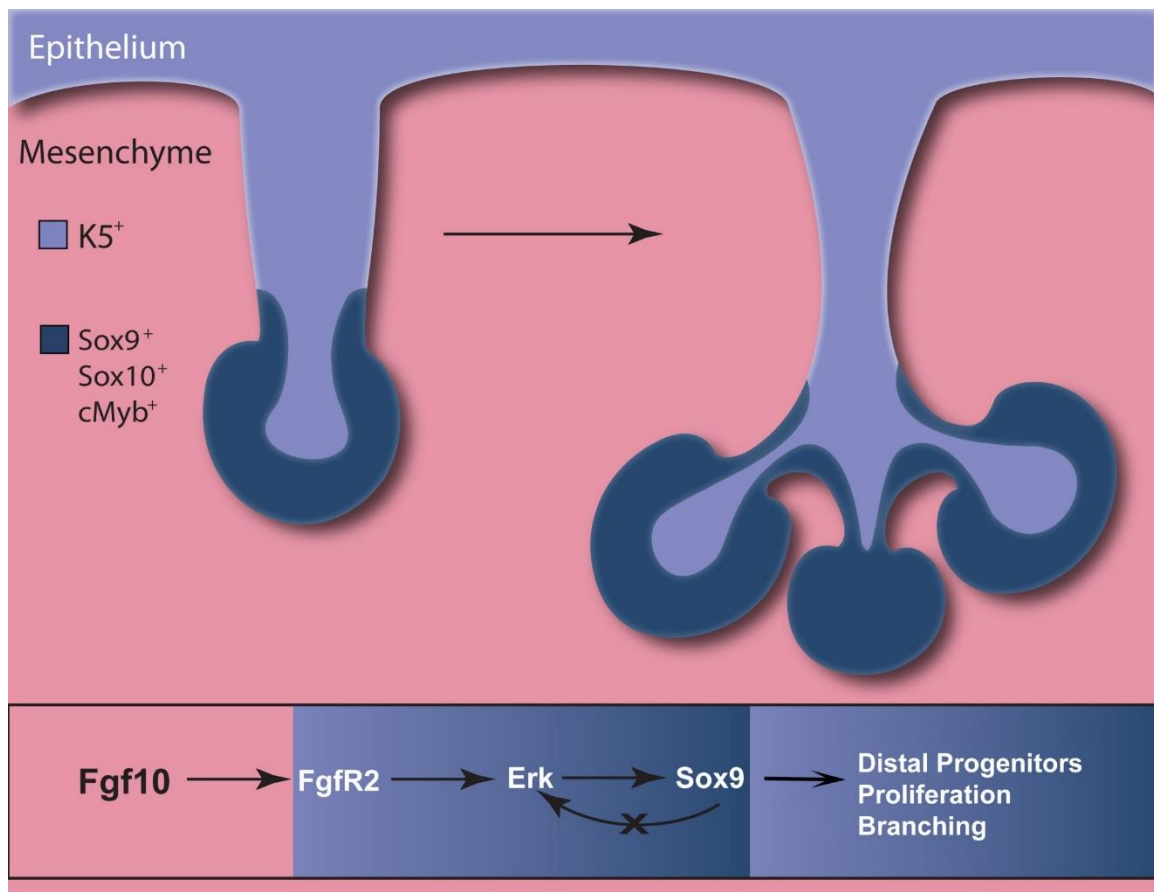

**Figure 10. Proposed model of Fgf10 and Sox9 function during salivary gland budding and branching morphogenesis.** Sox9 is required for branching initiation by promoting the formation of distal epithelial progenitors and their proliferation. Mesenchymal Fgf10 maintains epithelial Sox9 expression during salivary gland development by activating the Erk pathway through FgfR2.



Supplementary Figures

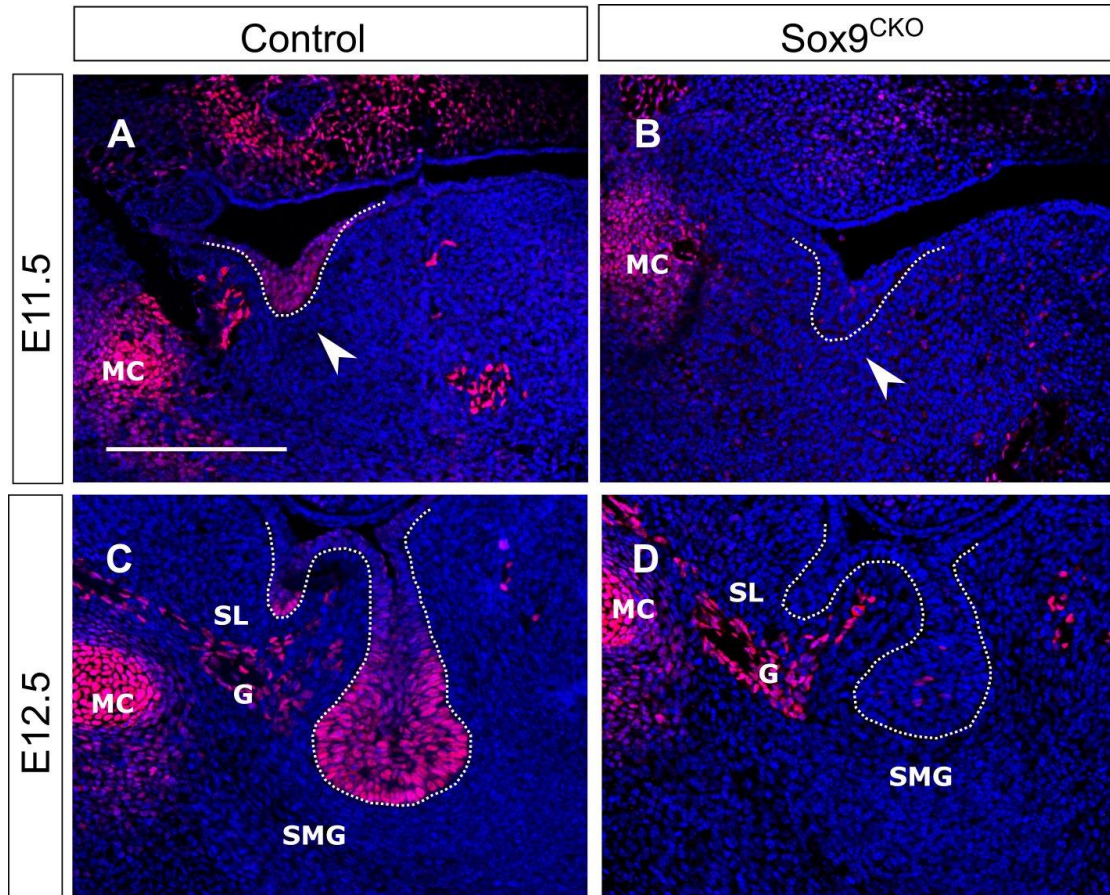

**Figure S1. *Sox9* is deleted from the epithelium of the placodes by E11.5 and it is not required for salivary gland initiation.** *Sox9* immunofluorescence (red) in the control (A, C) and *Sox9*<sup>CKO</sup> (B, D) submandibular glands at E11.5 (A, B) and E12.5 (C, D). Arrowheads indicate the placodes. MC: Meckel's cartilage, G: ganglion, SMG: submandibular gland, SL: sublingual gland. Scale bar: 200 $\mu$ m.

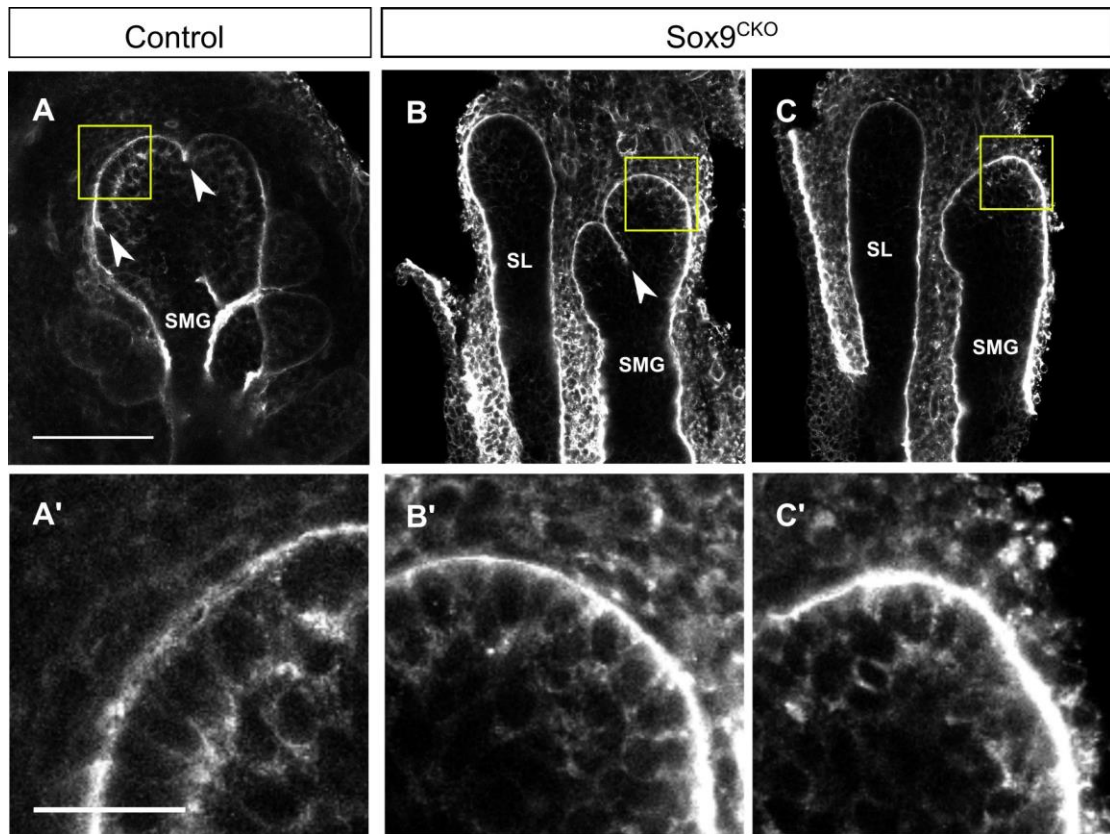

**Figure S2. Cleft formation and epithelial laminin lining visualised by immunofluorescence for laminin.** A-C Immunofluorescence for laminin in E13.5 control (A) and *Sox9*<sup>CKO</sup> salivary glands with (B) or without clefts (C). Scale bar: 100 $\mu$ m. A'-C': Magnification of the yellow box showing in A-C. Scale bar: 25 $\mu$ m. Arrowheads indicate clefts.

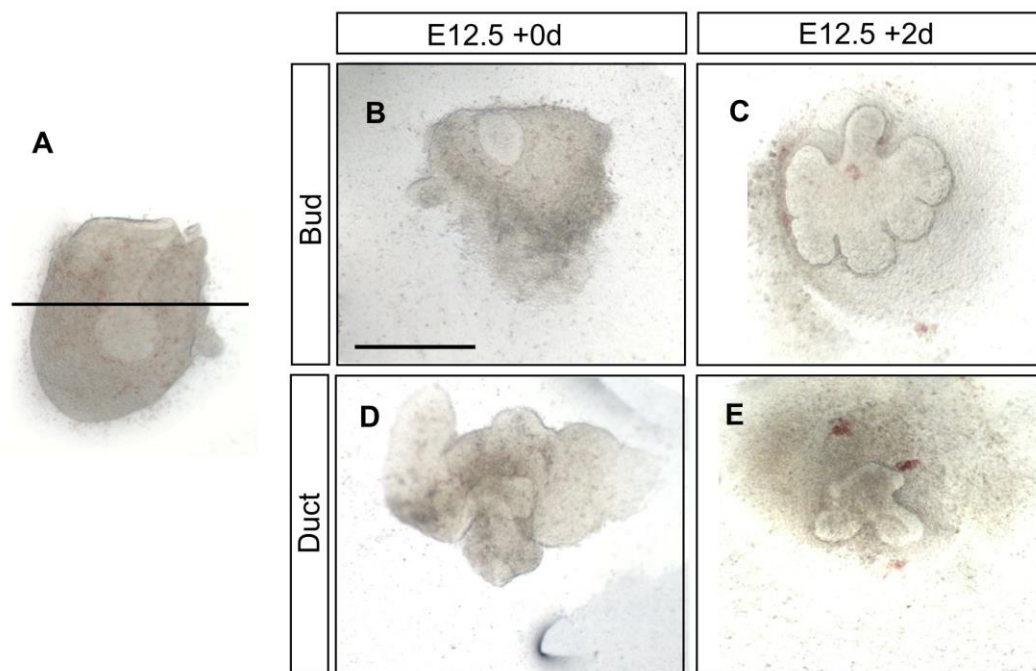

**Figure S3. Branch formation initiates and proceeds independently of the stalk region.** A: Brightfield image of a bud at E12.5 showing the level of dissection (black line). B, D: Dissected E12.5 enbud (B) and stalk (D) at the day of collection. C, E: Brightfield images of the bud (C) and stalk (E) region after 2 days of *ex vivo* explant culturing. Scale bar 500 $\mu$ m.



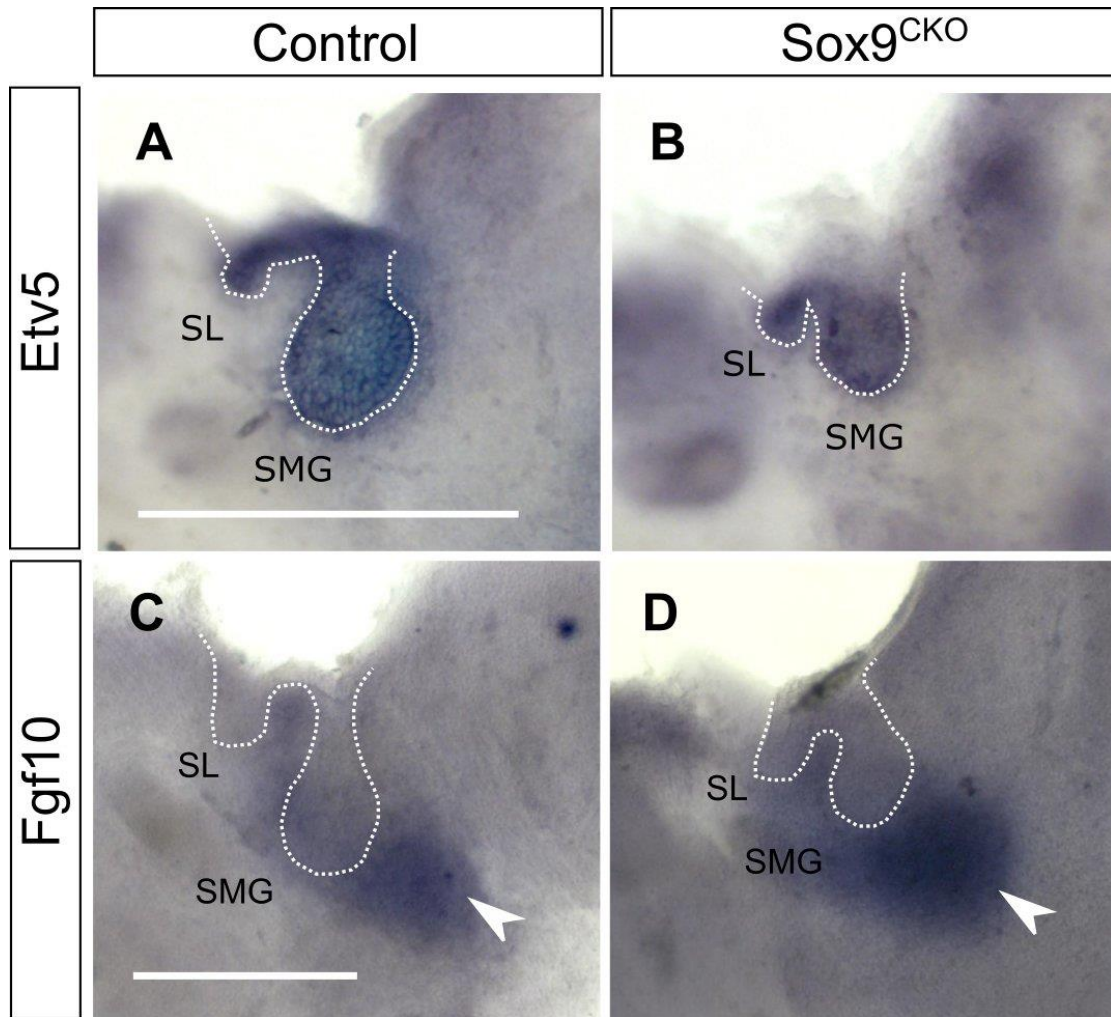

**Figure S4.** Erk signalling and *Fgf10* expression seems unchanged in the *Sox9*<sup>CKO</sup> SMGs. *In situ* hybridization for *Etv5* (A, B) and *Fgf10* (C, D) in the control (A, C) and *Sox9*<sup>CKO</sup> (B, D) buds at E12.5. Arrowheads indicate the expression of *Fgf10* in the mesenchyme. Scale bars: 500µm.
